# Supplementary material for: A wide-range topological thermometer with Ta2Pd3Te5: From power-law response to application prospects
Source: Research Square preprint supplement (doi:10.21203/rs.3.rs-7735000/v1), 2025-10-29
Supplement: Supplementary file 1 [file 754a428b21e1674f928c5ad7.docx]

**Supplementary information for**

A wide-range topological thermometer with Ta2Pd3Te5: From power-law response to application prospects

Yupeng Li,1, 2, * Anqi Wang,2, 3, [*](file:///D:\goodjob\15%20Ta2Pd3Te5温度计\文章\TaPdTethermometer_25年NpjQM\TaPdTeSCdiode_natSI\Ta2Pd3Te5thermometer_SI.docx#bookmark1) Senyang Pan,4 Dayu Yan,2 Guang Yang,2 Xingchen Guo,2, 3 Yu Hong,2, 3 Zhiyuan Zhang,2, 3 Ziwei Dou,2 Guangtong Liu,2, 5 Fanming

Qu,2, 3, 5 Zhijun Wang,2, 3 Tian Qian,2, 5 Jinglei Zhang,4, † Youguo Shi,2, 5, ‡ Li Lu,2, 3, 5, [§](file:///D:\\goodjob\\15%20Ta2Pd3Te5温度计\\文章\\TaPdTethermometer_25年NpjQM\\TaPdTeSCdiode_natSI\\Ta2Pd3Te5thermometer_SI.docx" \l "bookmark4) and Jie Shen2, 5, ¶

1 Hangzhou Key Laboratory of Quantum Matter, School of Physics,

Hangzhou Normal University, Hangzhou 311121, China

2 Beijing National Laboratory for Condensed Matter Physics,

Institute of Physics, Chinese Academy of Sciences, Beijing 100190, China

3 School of Physical Sciences, University of Chinese

Academy of Sciences, Beijing 100049, China

4 Anhui Province Key Laboratory of Condensed Matter Physics at Extreme Conditions, High Magnetic Field Laboratory of the Chinese

Academy of Sciences, Hefei 230031, Anhui, China

5 Songshan Lake Materials Laboratory, Dongguan 523808, China

——

* Equal contributions

† zhangjinglei@hmfl.ac.cn

‡ [ygshi@iphy.ac.cn](mailto:ygshi@iphy.ac.cn)

[§](file:///D:\\goodjob\\15%20Ta2Pd3Te5温度计\\文章\\TaPdTethermometer_25年NpjQM\\TaPdTeSCdiode_natSI\\Ta2Pd3Te5thermometer_SI.docx" \l "bookmark4) [lilu@iphy.ac.cn](mailto:lilu@iphy.ac.cn)

¶ [shenjie@iphy.ac.cn](mailto:shenjie@iphy.ac.cn)


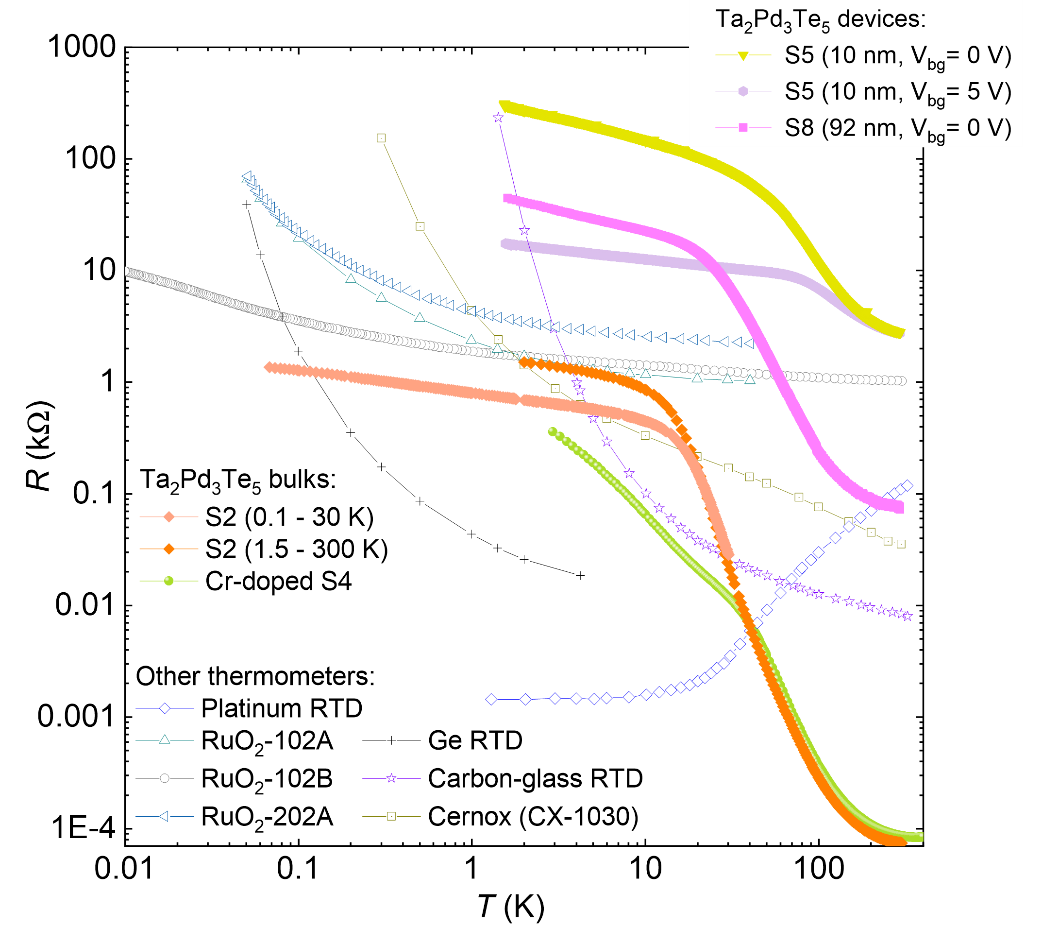


Figure S1. **Summary of Ta2Pd3Te5 and other thermometers.** Temperature-dependent resistance in Ta2Pd3Te5 thermometers, RuO2 and other thermometers (open scatters)1,2 is shown. Significantly, the rate of increase in resistance with decreasing temperature in Ta2Pd3Te5 thermometers is much lower than that in conventional semiconductor thermometers, indicating their great potential for lower temperature detection. The resistance of Ta2Pd3Te5 sample S2 exhibits slight variations between high (1.5 - 300 K) and low (0.1 - 30 K) temperature regimes, primarily due to differences in sample dimensions caused by varying electrode preparation conditions.


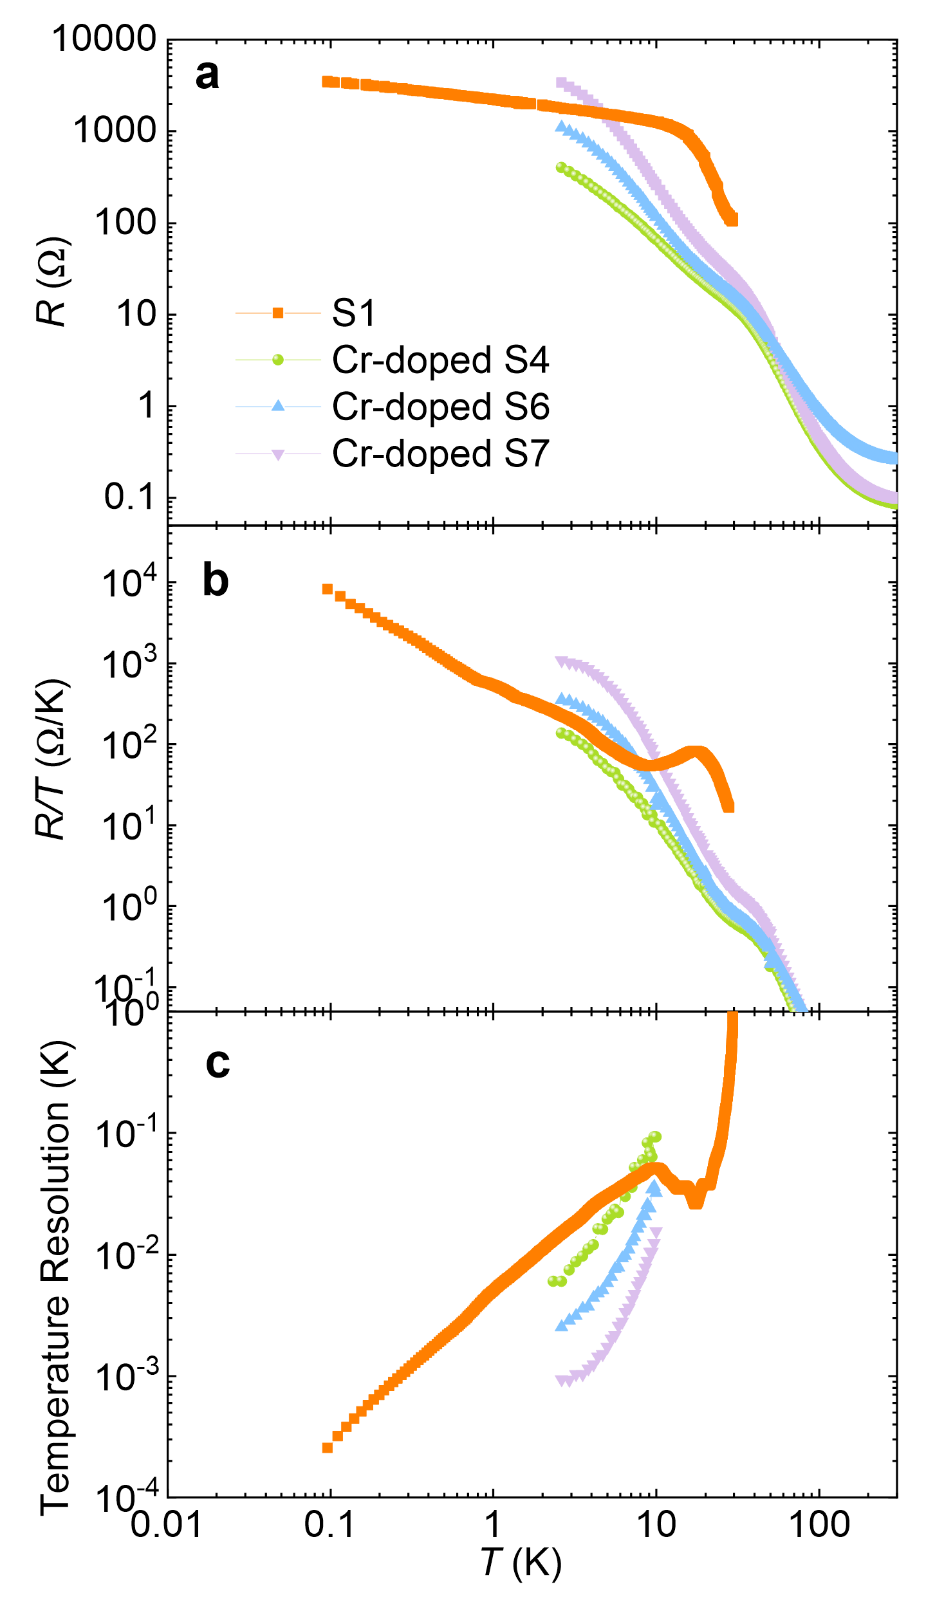


Figure S2. **Properties of Cr-doped Ta2Pd3Te5.** *R - T* curves (**a**), temperature sensitivity (**b**) and resolution (**c**) of three Cr-doped Ta2Pd3Te5 samples and an undoped sample S2 are shown. The approximate power law behavior at low temperatures displays α = 1.93 (2.35) with an error bar of ±0.05 for sample S6 (S7). The chemical composition of the three Cr-doped Ta2Pd3Te5 samples is also similar. The only low-temperature resolution of Cr-doped samples are shown, because discontinuous excitation current is applied at high temperatures, resulting in the discrete behavior.


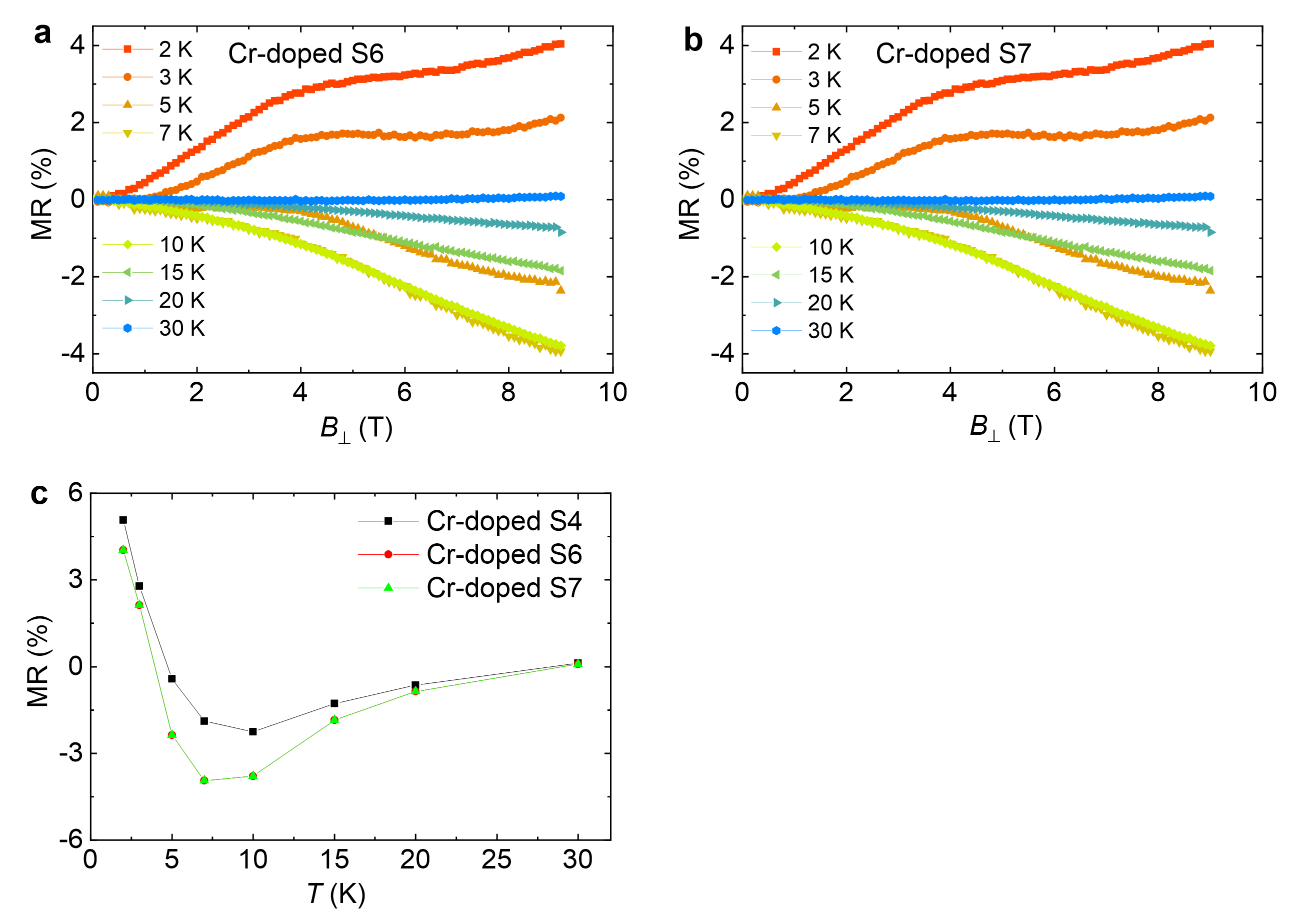


Figure S3. **Magnetoresistance of Cr-doped Ta2Pd3Te5.** Magnetoresistance of Cr-doped Ta2Pd3Te5 samples S6 (**a**) and S7 (**b**) at different temperatures. **c**, Magnetoresistance of three Cr-doped samples at 9 T.


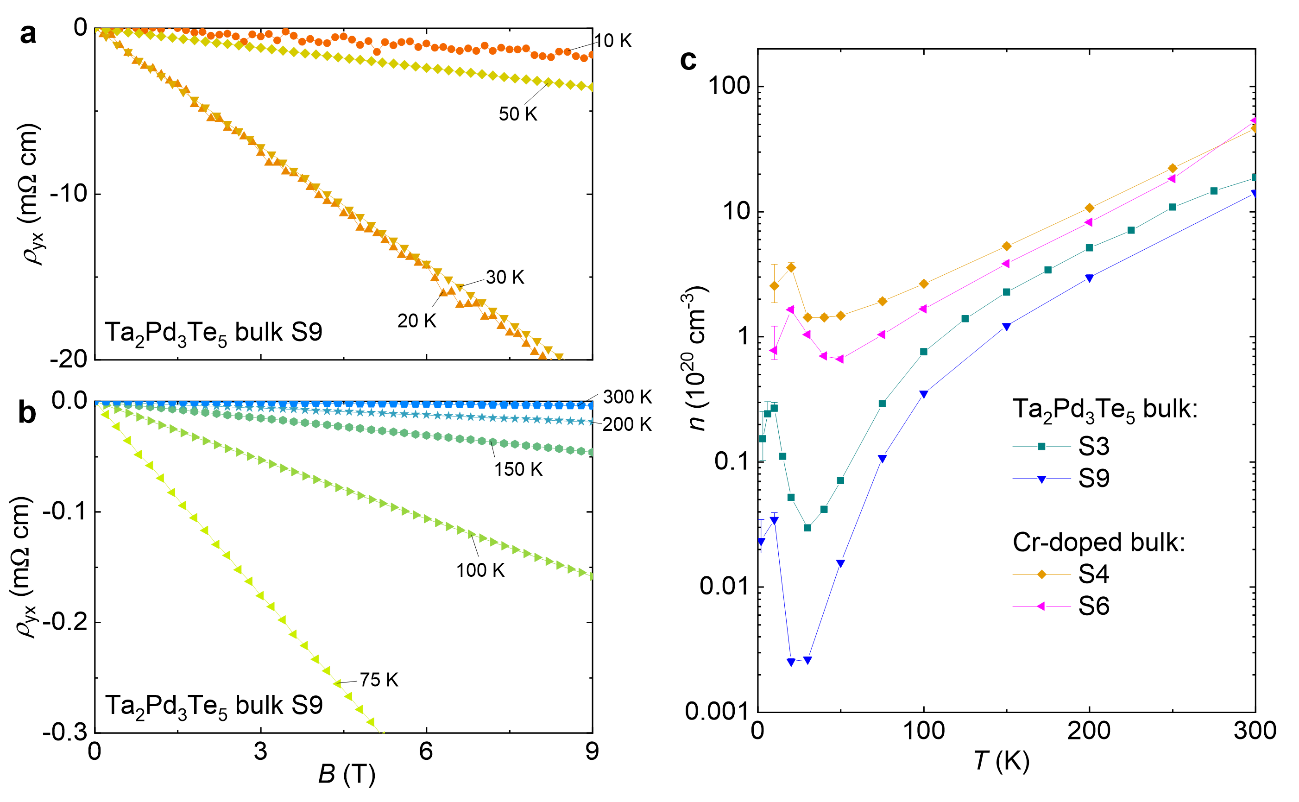


Figure S4. **Carrier density.** **a, b**, Typical Hall resistivity of Ta2Pd3Te5. The sample S9 shows the typical election-type Hall resistivity. **c**, Temperature-dependent carrier density for pristine undoped and Cr-doped Ta2Pd3Te5. Cr-doped Ta2Pd3Te5 samples display the higher carrier density than Ta2Pd3Te5.


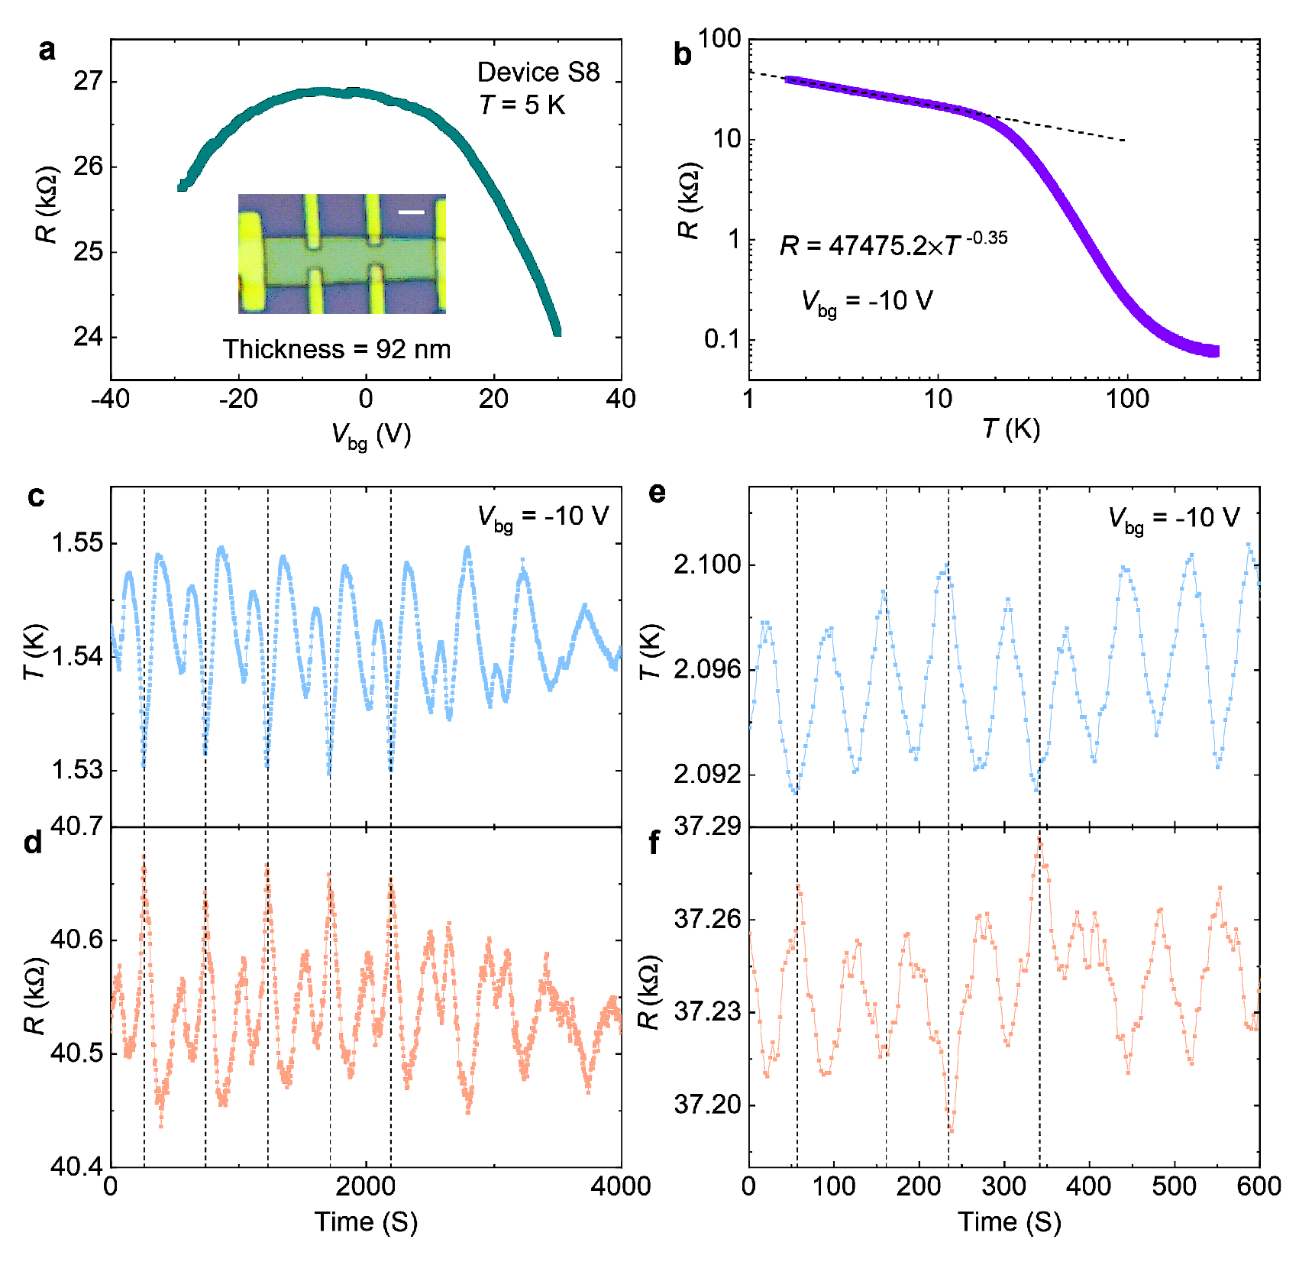


Figure S5. **Temperature sensitivity of** **Ta2Pd3Te5 device S8 as a function of time.** **a,** *Vbg*-dependent resistance of device S8 at 5 K. The inset displays the photomicrograph of device S8 with a thickness of 92 nm and SiO2/Si+ as bottom gate, and the white scale bar corresponds to 2 μm. **b**, *R - T* curve at *Vbg* = -10 V with α = -0.35. **c, e**, System temperature as a function of time at *Vbg* = -10 V. **d, f**, Corresponding resistance as a function of time and temperature. The oscillation behavior of temperature and resistance is consistent (see the typical dashed black lines), indicating high temperature sensitivity of Ta2Pd3Te5 thermometers at low temperatures.

Table SI. Summary of ultra-low temperature thermometers. It is important to note that values in italics in the temperature columns are the estimated resistance based on the power law or exponential behavior of the *R - T* curves, and the unit of resistance in the temperature columns is kΩ. The D*T/T* columns indicate the magnetic effect of the thermometers, and the thermometer precision is a ratio of temperature resolution to temperature.

|  |  |  |  |  |  |  |  |
| --- | --- | --- | --- | --- | --- | --- | --- |
| Sample | a | D*T/T* (2K, *B*⊥=9T) | Precision (0.1 K) | 0.1 K | 10 mK | 1 mK | 0.1 mK |
| Bulk S1 | 0.21 | 40% | 0.30% | 3.4 | *5.8* | *9.5* | *15.4* |
| S2 | 0.21 | 41% (54%, B||) | 0.60% | 1.3 | *2.1* | *3.3* | *5.4* |
| S3 | 0.31 | -- | 0.30% | 3.9 | *8.4* | *17* | *34.4* |
| Cr-doped S4 | 1.55 | 3.10% | ~0.3% (2 K) | *82* | *3000* | *--* | *--* |
| S5(*Vbg*=3V) | 0.49 | 10% (1.5 K, 6T) | 4 ×10-4 (2 K) | *320* | *988* | *> 103* | *--* |
| S5(*Vbg*=4V) | 0.28 | -- | 0.2% (2 K) | *69.3* | *130.7* | *246.1* | *464.3* |
| S5(*Vbg*=5V) | 0.17 | -- | 0.6% (2 K) | *27* | *39.5* | *57.8* | *84.5* |
| RuO2-102B2,3 | 0.46 | 15% | 4 ×10-4 | 3.6 | 9.9 | *28* | *83* |
| RuO2-102B2,4 | 0.38 | -- | -- | 1.9 | 4.6 | *11.3* | *27.2* |
| RuO2-102A1,2 | -- | 9% | 4 ×10-5 | 193.8 | *> 103* | -- | -- |
| RuO2-202A1,2 | -- | 2.50% | -- | 23.9 | *> 103* | -- | -- |
| Ge RTD2 | -- | 60% (8T) | 2 ×10-5 | 1.9 | *> 103* | -- | -- |


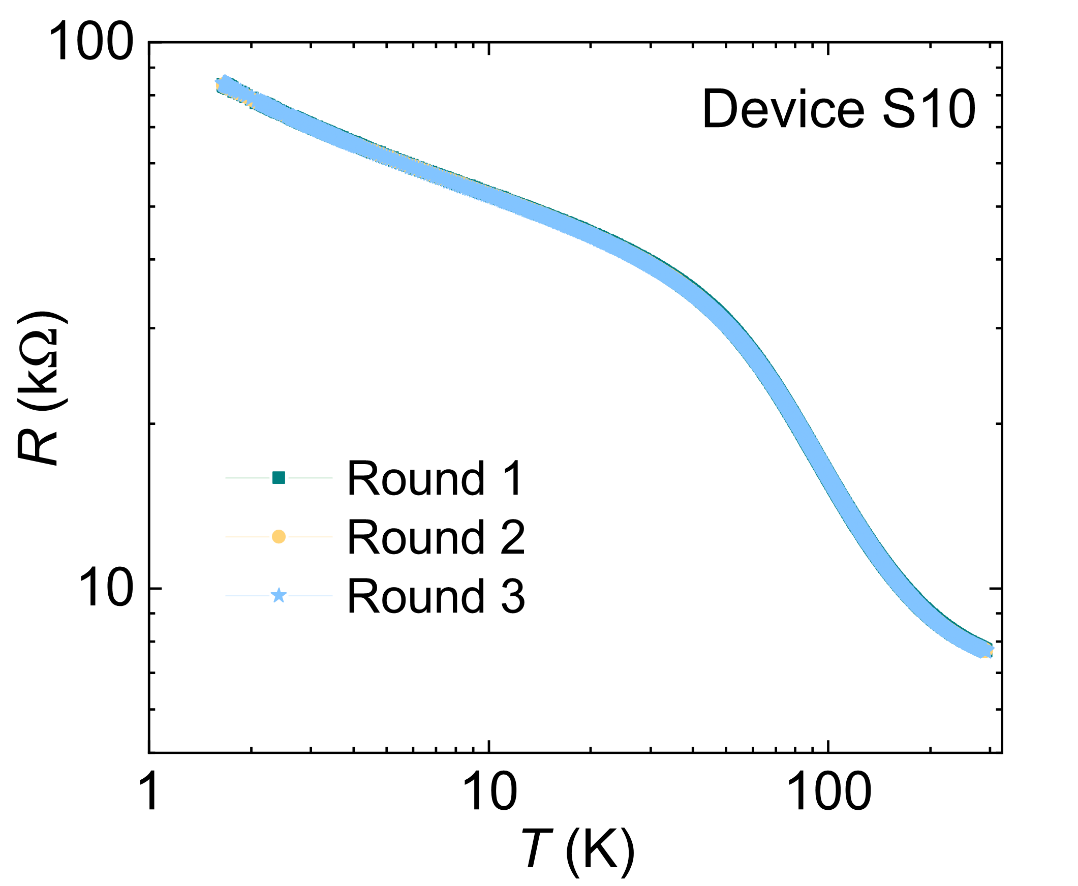


Figure S6. **Repeatability of the *R - T* characteristics in Ta2Pd3Te5 device S10 at *Vbg* = 6 V**.

Reference:

[1] Yeager, C. J. & Courts, S. S. A review of cryogenic thermometry and common temperature sensors. *IEEE*

*Sens*. J. **1**, 352-360 (2001).

[2] Lake Shore Cryotronics, U., Inc. OH.

[3] Courts, S. S. & Krause, J. K. a Commercial Ruthenium Oxide Thermometer for Use to 20 Millikelvin. *AIP Conf. Proc*. **985**, 947–954 (2008).

[4] Myers, S. A., Li, H. & Csáthy, G. A. A ruthenium oxide thermometer for dilution refrigerators operating

down to 5 mK. *Cryogenics* **119**, 103367 (2021).
